# Supplementary material
Source: PubMed Central journal article supplement (PMC6921665)
Supplement: IAI.00733-19-s0001.pdf [file IAI.00733-19-s0001.pdf]

1 Supplemental Figures

2 Figure S1

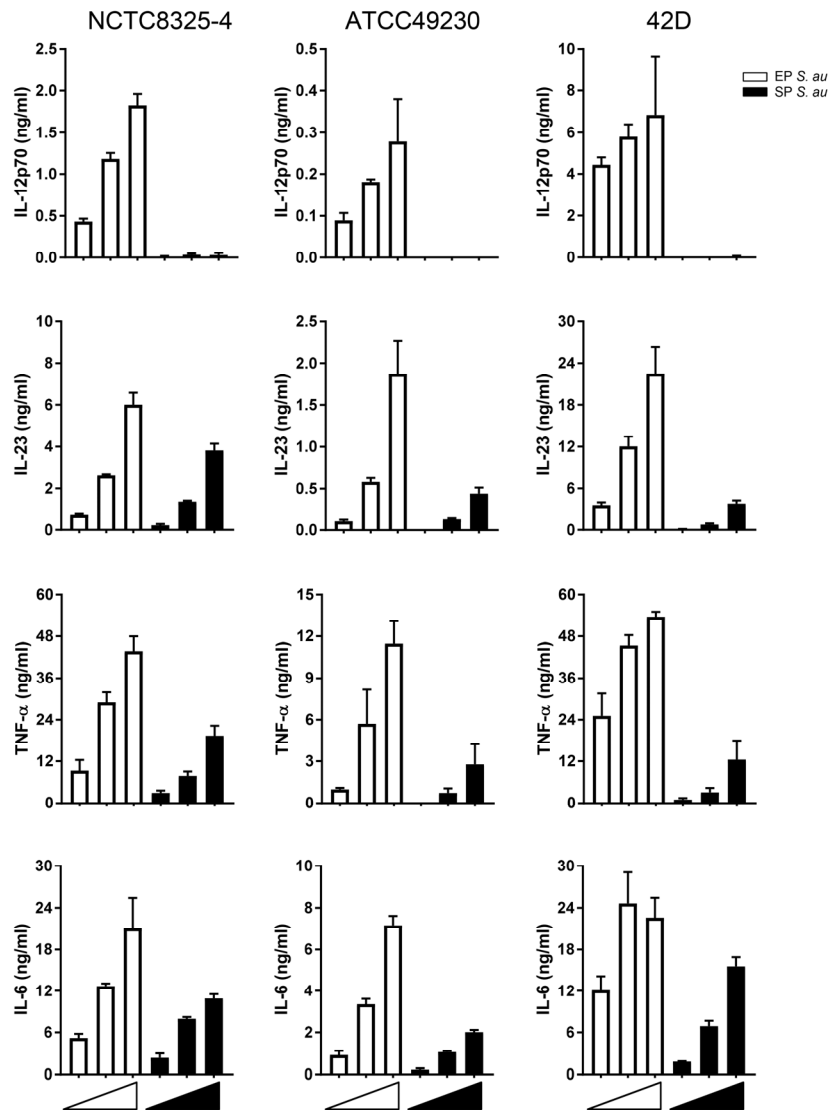

3

4 **Figure S1.** DC cytokine response to *S. aureus* strains in exponential or stationary growth  
5 phase. DCs were incubated with *S. aureus* strains NCTC8325-4 (left), ATCC49230 (middle)  
6 or 42D (right) in exponential (white) or stationary (black) phase with an MOI of 20, 50 or  
7 100. Levels of IL-12p70, IL-23, TNF- $\alpha$  and IL-6 in the supernatant were measured by ELISA.  
8 The absence of bars indicates cytokines were not detectable. Data shown are mean + SD of  
9 three technical replicates from one experiment with cells from one donor.

10

11 **Figure S2**

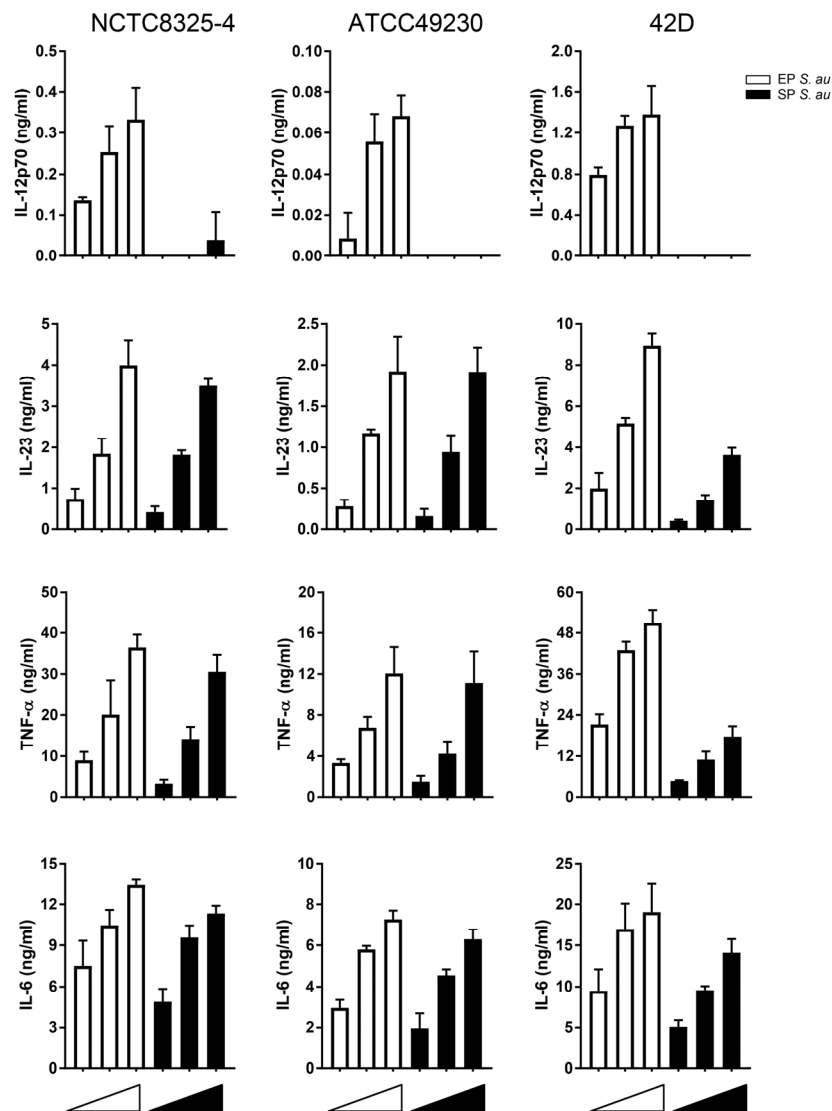

12

13 **Figure S2.** DC cytokine response to *S. aureus* strains in exponential or stationary growth  
14 phase. DCs were incubated with *S. aureus* strains NCTC8325-4 (left), ATCC49230 (middle)  
15 or 42D (right) in exponential (white) or stationary (black) phase with an MOI of 20, 50 or  
16 100. Levels of IL-12p70, IL-23, TNF- $\alpha$  and IL-6 in the supernatant were measured by ELISA.  
17 The absence of bars indicates cytokines were not detectable. Data shown are mean + SD of  
18 three technical replicates from one experiment with cells from one donor.
